# Supplementary material for: Gender-specific physical activity-related injuries and risk factors among university students in China: a multicentre population-based cross-sectional study
Source: HighWire-hosted journal article supplement (doi:10.1136/bmjopen-2020-040865), 2020-12-01
Supplement: bmjopen-2020-040865supp001_data_supplement.pdf [file bmjopen-2020-040865supp001_data_supplement.pdf]

Supplementary Table S1 Comparison of life-style variables in participants with PARI or not by gender

| Characteristics           | Males (n=1790)  |                      |                     | Females (n=3551) |                      |                     |
|---------------------------|-----------------|----------------------|---------------------|------------------|----------------------|---------------------|
|                           | PARI<br>(n=469) | Non-PARI<br>(n=1321) | $\chi^2/Z^*$        | PARI<br>(n=824)  | Non-PARI<br>(n=2727) | $\chi^2/Z^*$        |
|                           | $\bar{x}\pm s$  | $\bar{x}\pm s$       |                     | $\bar{x}\pm s$   | $\bar{x}\pm s$       |                     |
| Domestic/work/study       |                 |                      |                     |                  |                      |                     |
| VPA                       |                 |                      |                     |                  |                      |                     |
| Frequency, day/week       | 1.29±1.75       | 0.84±1.44            | 4.971 <sup>3</sup>  | 0.58±1.26        | 0.38±1.03            | 4.271 <sup>3</sup>  |
| Duration, min/day         | 24.83±46.12     | 14.82±34.09          | 4.305 <sup>3</sup>  | 11.85±36.14      | 5.80±17.31           | 4.652 <sup>3</sup>  |
| MPA                       |                 |                      |                     |                  |                      |                     |
| Frequency, day/week       | 2.10±1.96       | 1.72±1.95            | 3.630 <sup>3</sup>  | 1.66±1.93        | 1.32±1.82            | 4.522 <sup>3</sup>  |
| Duration, min/day         | 31.54±42.39     | 20.51±29.17          | 5.213 <sup>3</sup>  | 24.74±48.56      | 16.42±33.47          | 4.602 <sup>3</sup>  |
| Transportation            |                 |                      |                     |                  |                      |                     |
| Frequency, day/week       | 4.17±2.64       | 3.73±2.80            | 2.998 <sup>2</sup>  | 3.97±2.60        | 3.78±2.67            | 1.816               |
| Duration, min/day         | 42.66±49.36     | 32.14±35.69          | 4.349 <sup>3</sup>  | 37.59±48.80      | 34.64±45.06          | 1.549               |
| Sports and leisure-time   |                 |                      |                     |                  |                      |                     |
| VPA                       |                 |                      |                     |                  |                      |                     |
| Frequency, day/week       | 1.56±1.70       | 0.89±1.52            | 7.448 <sup>3</sup>  | 0.71±1.40        | 0.53±1.20            | 3.401 <sup>3</sup>  |
| Duration, min/day         | 34.24±40.90     | 16.65±31.36          | 8.471 <sup>3</sup>  | 13.42±29.23      | 9.73±22.61           | 3.330 <sup>3</sup>  |
| MPA                       |                 |                      |                     |                  |                      |                     |
| Frequency, day/week       | 1.89±1.95       | 1.41±1.89            | 4.640 <sup>3</sup>  | 1.52±1.92        | 1.16±1.74            | 4.914 <sup>3</sup>  |
| Duration, min/day         | 28.95±32.39     | 18.28±27.95          | 6.344 <sup>3</sup>  | 22.96±39.77      | 16.55±27.89          | 4.313 <sup>3</sup>  |
| Sleep duration, n (%)     |                 |                      | 4.055               |                  |                      | 13.345 <sup>1</sup> |
| <6 hours/day              | 33 (20.4)       | 129 (79.6)           |                     | 61 (27.0)        | 165 (73.0)           |                     |
| 6 to <7 hours/day         | 93 (27.2)       | 249 (72.8)           |                     | 145 (28.2)       | 370 (71.8)           |                     |
| 7 to <8 hours/day         | 184 (26.4)      | 513 (73.6)           |                     | 305 (20.9)       | 1151 (79.1)          |                     |
| 8 to <9 hours/day         | 126 (27.9)      | 325 (72.1)           |                     | 225 (22.8)       | 764 (77.2)           |                     |
| ≥9 hours/day              | 33 (24.1)       | 104 (75.9)           |                     | 88 (24.1)        | 277 (75.9)           |                     |
| Sedentary behavior, n (%) |                 |                      | 18.567 <sup>2</sup> |                  |                      | 7.094               |
| <4 hours/day              | 173 (21.3)      | 638 (78.7)           |                     | 269 (24.0)       | 853 (76.0)           |                     |
| 4 to <6 hours/day         | 42 (28.4)       | 106 (71.6)           |                     | 72 (28.9)        | 177 (71.1)           |                     |
| 6 to <9 hours/day         | 40 (30.3)       | 92 (69.7)            |                     | 71 (24.0)        | 225 (76.0)           |                     |
| 9 to <12 hours/day        | 62 (30.0)       | 145 (70.0)           |                     | 89 (20.1)        | 354 (79.9)           |                     |
| ≥12 hours/day             | 152 (30.9)      | 340 (69.1)           |                     | 323 (22.4)       | 1118 (77.6)          |                     |

\* Categorical variables (i.e., sleep duration and sedentary behaviour) were tested by Pearson chi-square tests, and continuous variables (except for sleep duration and sedentary behaviour) were tested by Mann-Whitney tests or independent-sample *t* tests (the frequency of transport-related PA); <sup>1</sup> *P*<0.05; <sup>2</sup> *P*<0.01; <sup>3</sup> *P*<0.001; PARI, physical activity-related injury; VPA, vigorous-intensity physical activity; MPA, moderate-intensity physical activity.
