# Supplementary material for: Gender-specific physical activity-related injuries and risk factors among university students in China: a multicentre population-based cross-sectional study
Source: HighWire-hosted journal article supplement (doi:10.1136/bmjopen-2020-040865), 2020-12-01
Supplement: bmjopen-2020-040865supp002_data_supplement.pdf [file bmjopen-2020-040865supp002_data_supplement.pdf]

Supplementary Table 2 Primary physical activities that university students participated

| Activity items | Total (N=3147), n (%) | Males (N=1107), n (%) | Females (N=2040), n (%) |
|----------------|-----------------------|-----------------------|-------------------------|
| Basketball     | 790 (25.1)            | 462 (41.7)            | 329 (16.1)              |
| Running        | 1778 (55.8)           | 548 (49.5)            | 1230 (60.3)             |
| Badminton      | 1518 (48.2)           | 458 (41.4)            | 1060 (52.0)             |
| Bicycling      | 525 (16.7)            | 156 (14.1)            | 369 (18.1)              |
| Swimming       | 391 (12.4)            | 137 (12.4)            | 254 (12.5)              |
| Table tennis   | 545 (17.3)            | 253 (22.9)            | 292 (14.3)              |
| Football       | 211 (6.7)             | 139 (12.6)            | 72 (3.5)                |
| Dance          | 187 (5.9)             | 25 (2.3)              | 162 (7.9)               |
| Fitness        | 258 (8.2)             | 101 (9.1)             | 157 (7.7)               |

This table only listed those physical activities of participation rate more than 5%.
