# Supplementary material for: Gender-specific physical activity-related injuries and risk factors among university students in China: a multicentre population-based cross-sectional study
Source: HighWire-hosted journal article supplement (doi:10.1136/bmjopen-2020-040865), 2020-12-01
Supplement: bmjopen-2020-040865supp004_data_supplement.pdf [file bmjopen-2020-040865supp004_data_supplement.pdf]

Supplementary Table S4 Comparison of all related variables among university students in different cities

| Characteristics           | Shantou        | Jinan          | Xi'an          | Nanchang       | $\chi^2/F^*$         |
|---------------------------|----------------|----------------|----------------|----------------|----------------------|
|                           | (n=2123)       | (n=1267)       | (n=714)        | (n=1237)       |                      |
|                           | $\bar{x}\pm s$ | $\bar{x}\pm s$ | $\bar{x}\pm s$ | $\bar{x}\pm s$ |                      |
| Domestic/work/study       |                |                |                |                |                      |
| VPA                       |                |                |                |                |                      |
| Frequency, day/week       | 0.49±1.21      | 0.65±1.36      | 0.69±1.37      | 0.71±1.27      | 110.025 <sup>3</sup> |
| Duration, min/day         | 9.54±30.39     | 11.95±26.86    | 14.55±33.39    | 8.89±27.25     | 87.325 <sup>3</sup>  |
| MPA                       |                |                |                |                |                      |
| Frequency, day/week       | 1.37±1.80      | 1.39±1.82      | 1.50±1.81      | 1.56±1.85      | 39.878 <sup>3</sup>  |
| Duration, min/day         | 22.04±46.98    | 20.96±28.38    | 21.26±34.46    | 14.97±19.79    | 28.091 <sup>3</sup>  |
| Transportation            |                |                |                |                |                      |
| Frequency, day/week       | 4.19±2.68      | 4.19±2.72      | 2.96±2.45      | 3.35±2.64      | 63.323 <sup>3</sup>  |
| Duration, min/day         | 33.48±37.86    | 36.06±36.29    | 45.62±73.68    | 31.18±36.82    | 20.658 <sup>3</sup>  |
| Sports and leisure time   |                |                |                |                |                      |
| VPA                       |                |                |                |                |                      |
| Frequency, day/week       | 0.66±1.33      | 0.91±1.59      | 0.72±1.32      | 0.69±1.32      | 31.724 <sup>3</sup>  |
| Duration, min/day         | 13.43±28.85    | 18.12±30.86    | 16.68±32.85    | 9.92±22.76     | 41.852 <sup>2</sup>  |
| MPA                       |                |                |                |                |                      |
| Frequency, day/week       | 1.29±1.79      | 1.73±2.03      | 1.38±1.77      | 1.00±1.67      | 112.709 <sup>3</sup> |
| Duration, min/day         | 19.49±31.62    | 25.21±39.45    | 21.99±35.78    | 10.32±19.76    | 181.535 <sup>3</sup> |
| Age (years)               | 19.92±1.27     | 19.69±1.16     | 19.46±1.29     | 19.03±1.17     | 54.227 <sup>3</sup>  |
|                           | n (%)          | n (%)          | n (%)          | n (%)          |                      |
| Grade                     |                |                |                |                | 515.974 <sup>3</sup> |
| Year 1                    | 698 (32.9)     | 453 (35.8)     | 432 (60.5)     | 791 (63.9)     |                      |
| Year 2                    | 691 (32.5)     | 443 (35.0)     | 180 (25.2)     | 344 (27.8)     |                      |
| Year 3                    | 734 (34.6)     | 371 (29.3)     | 102 (14.3)     | 102 (8.2)      |                      |
| Gender                    |                |                |                |                | 441.055 <sup>3</sup> |
| Male                      | 569 (26.8)     | 337 (26.6)     | 165 (23.1)     | 719 (58.1)     |                      |
| Female                    | 1554 (73.2)    | 930 (73.4)     | 549 (76.9)     | 518 (41.9)     |                      |
| Residence type            |                |                |                |                | 204.376 <sup>3</sup> |
| Dormitory                 | 1511 (71.2)    | 1050 (82.9)    | 393 (55.0)     | 816 (66.0)     |                      |
| Home                      | 587 (27.6)     | 210 (16.6)     | 309 (43.3)     | 385 (31.1)     |                      |
| Other                     | 25 (1.2)       | 7 (0.6)        | 12 (1.7)       | 36 (2.9)       |                      |
| Sports team member        |                |                |                |                | 16.045 <sup>2</sup>  |
| No                        | 1861 (87.7)    | 1096 (86.5)    | 659 (92.3)     | 1098 (88.8)    |                      |
| Yes                       | 262 (12.3)     | 171 (13.5)     | 55 (7.7)       | 139 (11.2)     |                      |
| Chronic disease/symptom   |                |                |                |                | 72.979 <sup>3</sup>  |
| No                        | 2028 (95.5)    | 1226 (96.8)    | 681 (95.4)     | 1109 (89.7)    |                      |
| Yes                       | 95 (4.5)       | 41 (3.2)       | 33 (4.6)       | 128 (10.3)     |                      |
| Sleep duration, n (%)     |                |                |                |                | 193.604 <sup>1</sup> |
| <6 hours/day              | 110 (5.2)      | 58 (4.6)       | 68 (9.5)       | 152 (12.3)     |                      |
| 6 to <7 hours/day         | 365 (17.2)     | 158 (12.5)     | 70 (9.8)       | 264 (21.3)     |                      |
| 7 to <8 hours/day         | 841 (39.6)     | 608 (48.0)     | 260 (36.4)     | 444 (35.9)     |                      |
| 8 to <9 hours/day         | 563 (26.5)     | 353 (27.9)     | 236 (33.1)     | 288 (23.3)     |                      |
| ≥9 hours/day              | 244 (11.5)     | 90 (7.0)       | 80 (11.2)      | 89 (7.2)       |                      |
| Sedentary behavior, n (%) |                |                |                |                | 748.383 <sup>3</sup> |
| <4 hours/day              | 537 (25.3)     | 298 (23.5)     | 306 (42.9)     | 792 (64.0)     |                      |
| 4 to <6 hours/day         | 157 (7.4)      | 79 (6.2)       | 62 (8.7)       | 99 (8.0)       |                      |
| 6 to <9 hours/day         | 146 (6.9)      | 118 (9.3)      | 78 (10.9)      | 86 (7.0)       |                      |
| 9 to <12 hours/day        | 300 (14.1)     | 176 (13.9)     | 84 (11.8)      | 90 (7.3)       |                      |
| ≥12 hours/day             | 983 (46.3)     | 596 (47.0)     | 184 (25.8)     | 170 (13.7)     |                      |

\* Categorical variables were tested by Pearson chi-square tests, and continuous variables were tested by one-way ANOVA tests (i.e., age and the frequency of transport-related PA) or Kruskal-Wallis tests (except for age and the frequency of transport-related PA); <sup>1</sup>  $P<0.05$ ; <sup>2</sup>  $P<0.01$ ; <sup>3</sup>  $P<0.001$ ; PARI, physical activity-related injury; VPA, vigorous-intensity physical activity; MPA, moderate-intensity physical activity.
